# Supplementary material for: Area-selective Ru ALD by amorphous carbon modification using H plasma: from atomistic modeling to full wafer process integration
Source: Royal Society of Chemistry journal article supplement (doi:10.1039/d0ma00462f), 2020-01-01
Supplement: d0ma00462f1.pdf [file d0ma00462f1.pdf]

## Supporting information

### **Area-selective Ru ALD by amorphous carbon modification using H plasma: from atomistic modeling to full wafer process integration.**

Ivan Zyul'kov<sup>\*a,b,†</sup>, Ekaterina Voronina<sup>c,d</sup>, Mikhail Krishtab<sup>a,b</sup>, Dmitry Voloshin<sup>d</sup>, BT Chan<sup>b</sup>, Yuri Mankelevich<sup>d</sup>, Tatyana Rakhimova<sup>d</sup>, Silvia Armini<sup>b</sup> and Stefan De Gendt<sup>a,b</sup>

---

<sup>a</sup> *KU Leuven, Department of Chemistry, Faculty of Science, B-3001 Leuven, Belgium.*

<sup>b</sup> *Imec, Kapeldreef 75, B-3001 Leuven, Belgium.*

<sup>c</sup> *Lomonosov Moscow State University, Faculty of Physics, Leninskie Gory, GSP-1, Moscow 119991, Russian Federation.*

<sup>d</sup> *Lomonosov Moscow State University, Skobeltsyn Institute of Nuclear Physics, Leninskie gory, GSP-1, Moscow 119991, Russian Federation.*

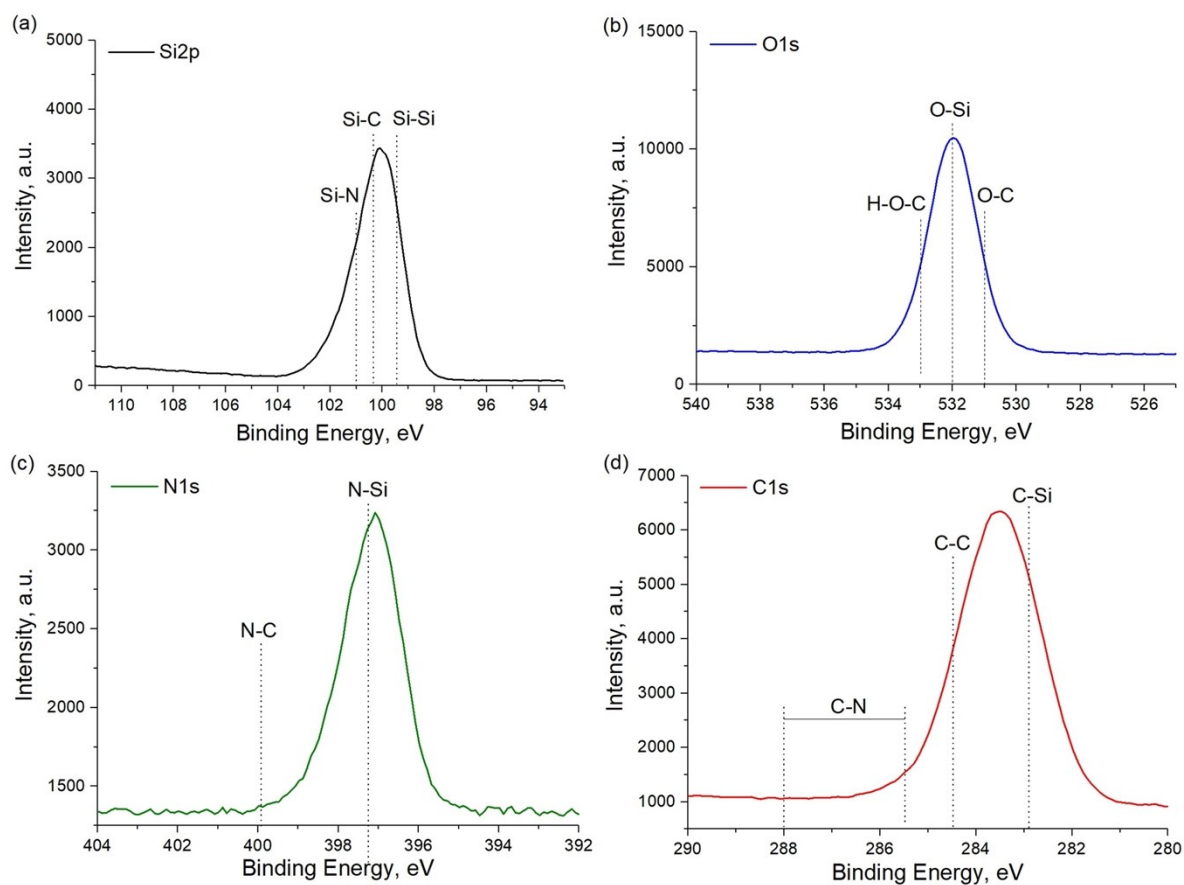

**Figure S1.** (a) Si2p, (b) O1s, (c) N1s and (d) C1s high-resolution XPS spectra on as deposited SiCN. Water contact angle of as deposited SiCN is  $74.9 \pm 1.1$  degrees.

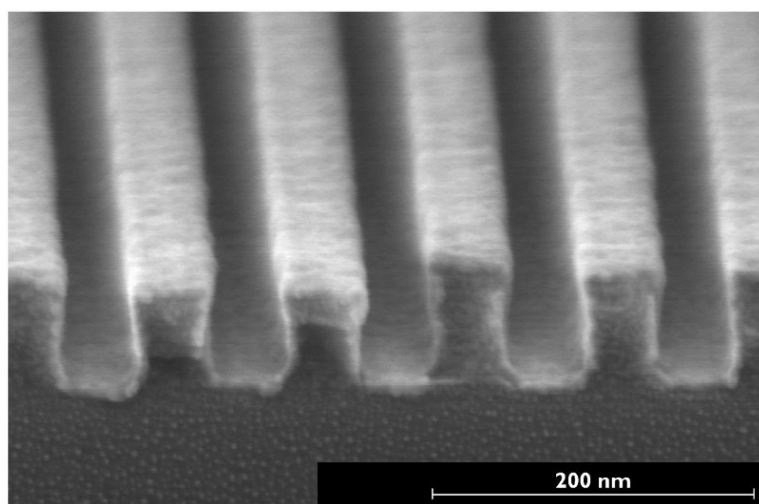

**Figure S2.** Cross-sectional images of a-C lines formed by  $\text{H}_2/\text{N}_2$  CCP plasma after 100 cycles of Ru ALD at  $275^\circ\text{C}$  as measured by SEM.

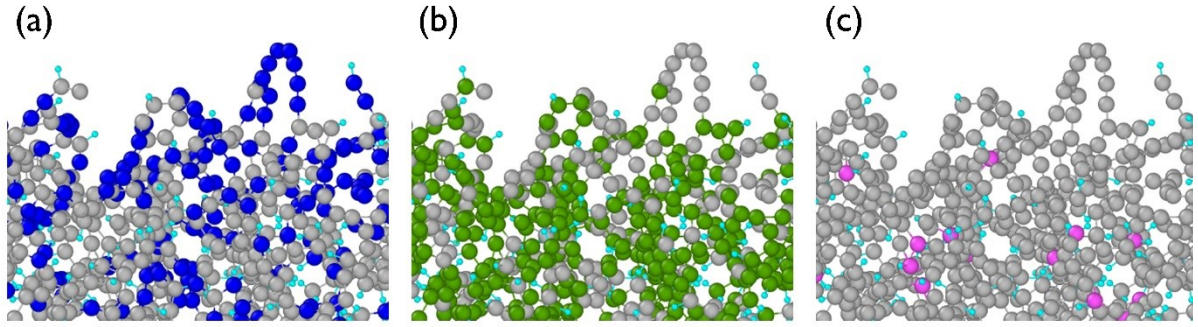

**Figure S3.** Side view images of the upper a-C layer modified by H ions with fluence of  $3.2 \times 10^{16} \text{ cm}^{-2}$ . C atoms with (a)  $sp$ , (b)  $sp^2$  and (c)  $sp^3$  hybridizations are indicated by blue, green and purple colors respectively.

Similar results were observed by V. Martirosyan et al. for the Si crystal modification in H ions studied by MD simulations.<sup>1</sup> Hydrogenation of Si is reported for the Si bulk and not for the Si surface. However, it should be noted that in the simulation of a-C modification with H ions no saturation of H content was observed, and the steady state was not achieved (reported saturation fluence for silicon is  $3.2 \times 10^{16} \text{ cm}^{-2}$ ).

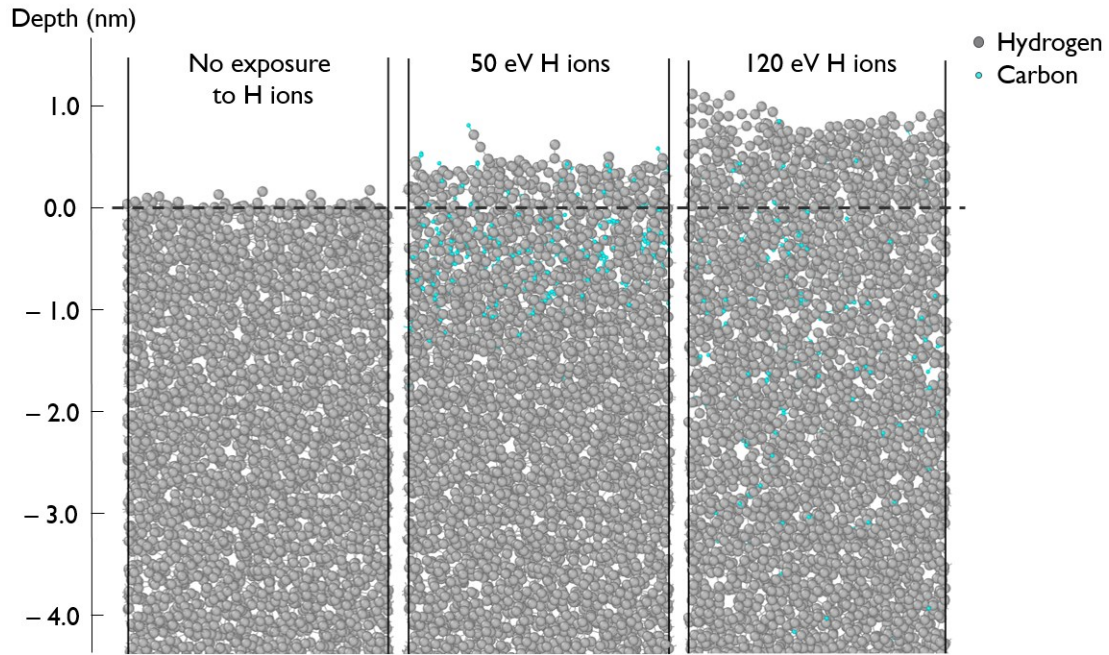

**Figure S4.** Cross-sectional images of the a-C layer modified by 50 eV H ions (100 W) and 120 eV H ions (300 W) at the fluence of  $8 \cdot 10^{15} \text{ cm}^{-2}$

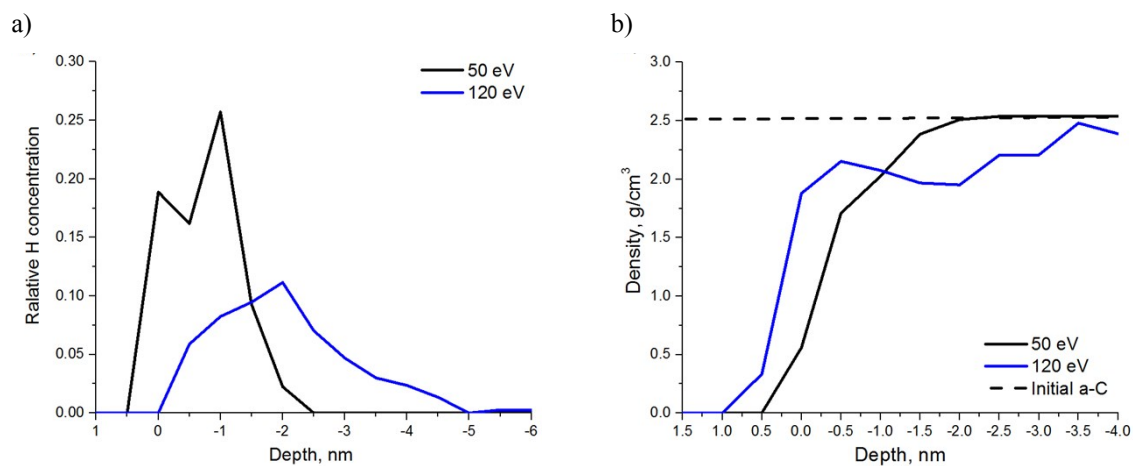

**Figure S5.** Depth profiles of (a) relative H concentration and (b) a-C density after exposure to H ions at 50 eV and 120 eV with the ion fluence of  $8 \cdot 10^{15} \text{ cm}^{-2}$ .

#### References:

- (1) Martirosyan, V.; Joubert, O. Modification Mechanisms of Silicon Thin Films in Low-Temperature Hydrogen Plasmas. **2019**. <https://doi.org/10.1088/1361-6463/aaefe0>.
